# Supplementary material
Source: Springer Nature journal article supplement (https://www.springermedizin.de/resource/supplementary/13058_2005_1339_MOESM2_ESM.pdf/9698888)

# Overall Survival (DTC-BM)

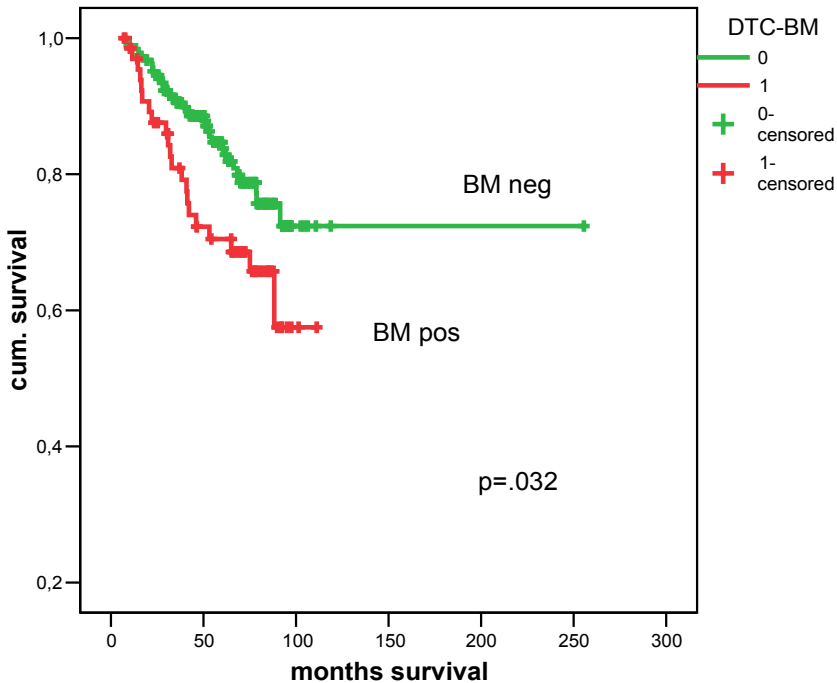

Supplement: MOESM2 [file 9698888]
